# Supplementary material for: A novel trisprotonated β-dialdiminate cryptand
Source: Royal Society of Chemistry journal article supplement (doi:10.1039/b821237f), 2009-01-01
Supplement: b821237f.pdf [file b821237f.pdf]

**Supplementary information:**

**S1. Supplementary magnetic data**

**Complex 5,  $\text{Cu}_2\text{L}^4(\text{CF}_3\text{SO}_3)_2(\text{NO}_3)_2$**

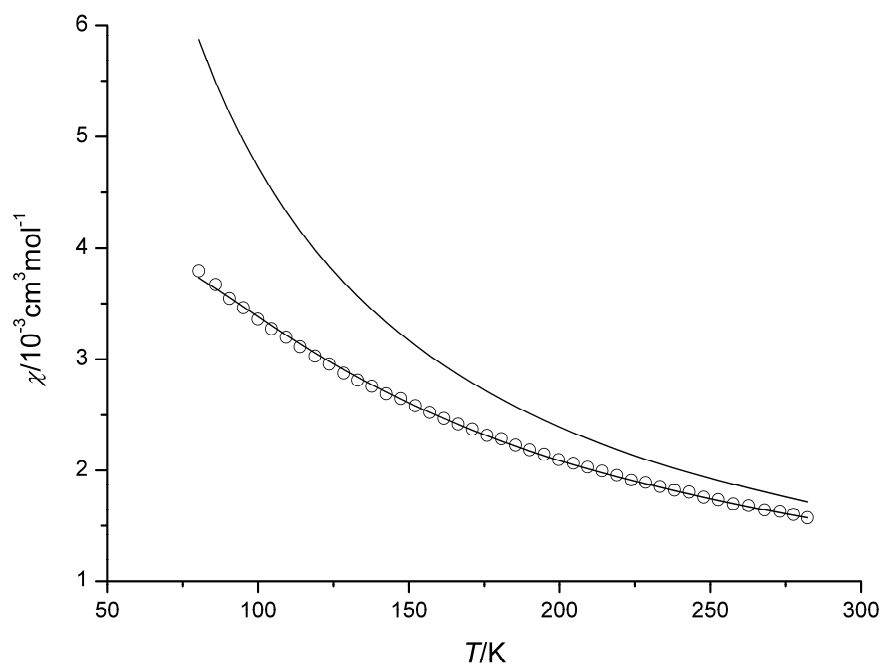

**Figure S1**

Magnetic behaviour of complex **5**,  $\text{Cu}_2\text{L}^4(\text{CF}_3\text{SO}_3)_2(\text{NO}_3)_2$ . Values of  $\mu$  per Cu(II) ion (open circles) are plotted against  $T$ . Moderate antiferromagnetic exchange is evident from a comparison with the upper line which shows Curie-law behaviour. Attempts to fit the the Bleaney-Bowers equation to the data give parameters of;  $-2J = 130 \text{ cm}^{-1}$ ,  $g = 1.98$  and a paramagnetic impurity of 0.30 (lower line in the Figure), whereas if no impurity is assumed the parameters are  $-2J = 68 \text{ cm}^{-1}$ ,  $g = 2.23$ . The temperature-independent paramagnetism was set at  $60 \times 10^{-6} \text{ cm}^3 \text{ mol}^{-1}$  per Cu(II).

**Complex 6,  $\text{Cu}_2\text{L}^4(\text{Cl}_4)\text{MeOH}\cdot 2\text{H}_2\text{O}$**

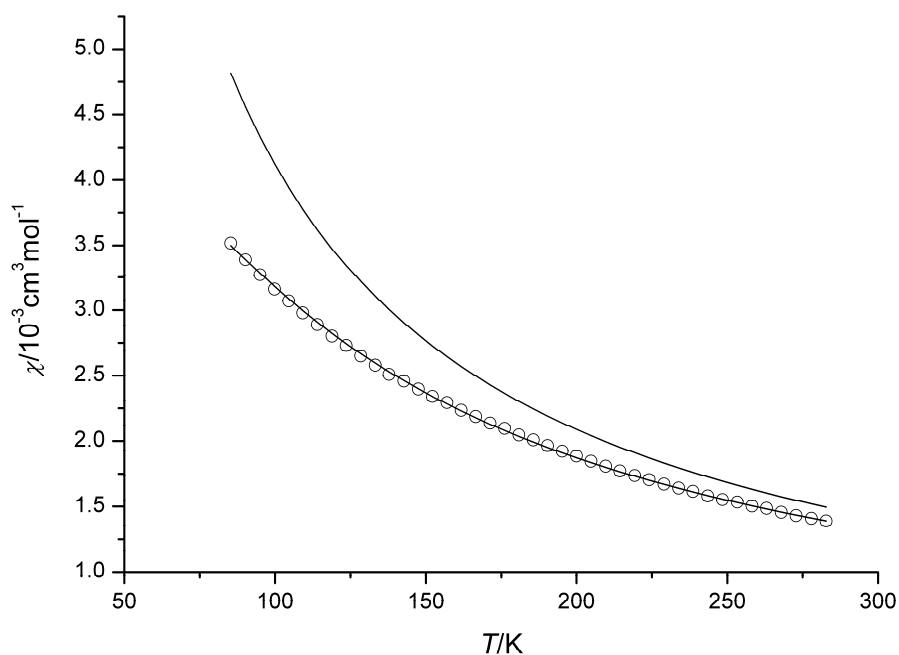

**Figure S2** Magnetic behaviour of complex **6**,  $\text{Cu}_2\text{L}^4(\text{Cl}_4)\text{MeOH}\cdot 2\text{H}_2\text{O}$ . Values of  $\mu$  per Cu(II) ion (open circles) are plotted against  $T$ . Moderate antiferromagnetic exchange is evident from a comparison with the upper line which shows Curie-law behaviour. Attempts to fit the the Bleaney-Bowers equation to the data give parameters of;  $-2J = 55 \text{ cm}^{-1}$ ,  $g = 2.1$ . The temperature-independent paramagnetism was set at  $60 \times 10^{-6} \text{ cm}^3 \text{ mol}^{-1}$  per Cu(II).

**Complex 8b, Cu<sub>2</sub>L<sup>5</sup> (BF<sub>4</sub>)<sub>3</sub>OH**

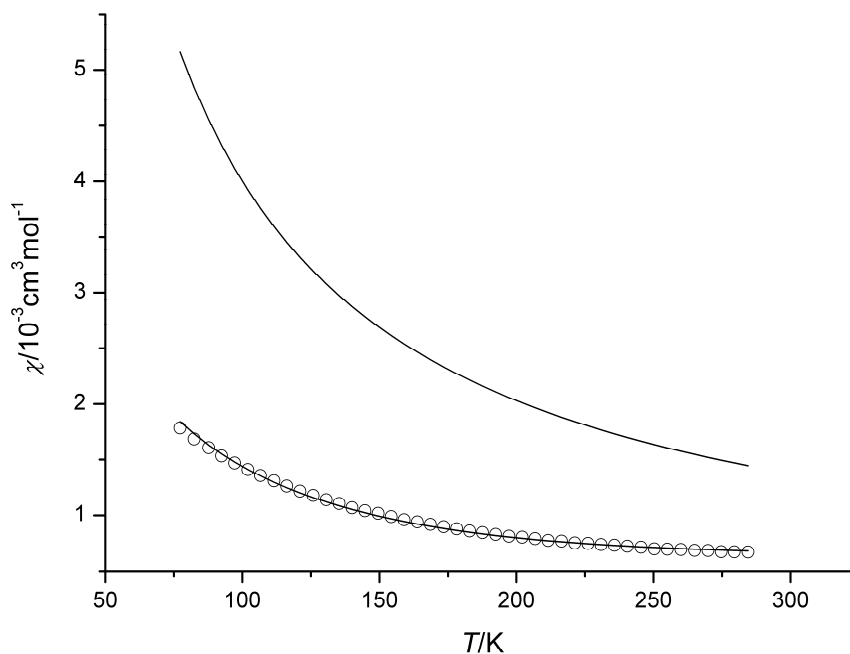

**Figure S3** Magnetic behaviour of complex **8b**, Cu<sub>2</sub>L<sup>5</sup> (BF<sub>4</sub>)<sub>3</sub>OH.

Values of  $\mu$  per Cu(II) ion (open circles) are plotted against  $T$ . Comparison of the data with the upper line, Curie-law behaviour, shows very strong antiferromagnetic exchange. Fitting the the Bleaney-Bowers equation to the data and allowing for a paramagnetic impurity gives an exchange parameter of  $-2J = 680 \text{ cm}^{-1}$  with  $g = 2.05$  and a paramagnetic impurity of 0.17 (lower line in the Figure). In each case the temperature-independent paramagnetism was set at  $60 \times 10^{-6} \text{ cm}^3 \text{ mol}^{-1}$  per Cu(II).

## 2.Nmr spectral data

**Figure S4**  
**Course of the hydrolysis reaction of 4 in D2O**

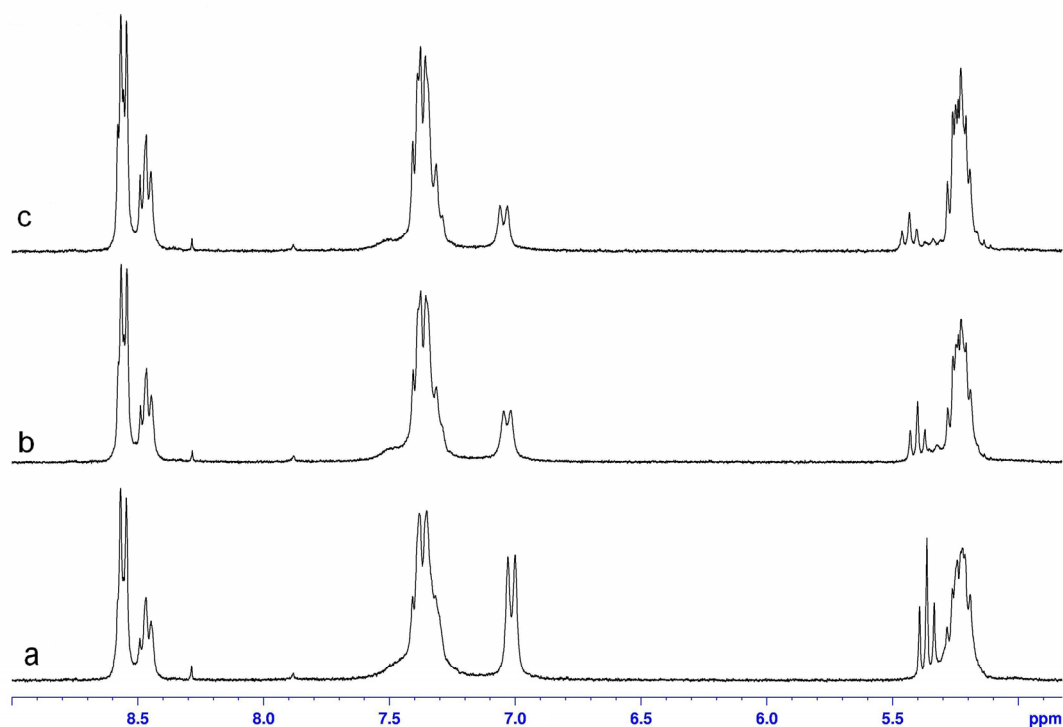

a after 1hr; b after 4 hr; c after 24hr;  $\approx 7.0$ ,d,ppm and  $\approx 5.4$ ,t,ppm signals represent remnant reactant cryptand.

**TableS1: NMR Spectra of the hydrolysis product of 4 (ppm /TMS)**

| $^1\text{H}$ resonance | Correlated $^{13}\text{C}$ resonance <sup>b</sup> | Coupling to $^1\text{H}$ resonance at: | Comment                                                                                                                                                    |
|------------------------|---------------------------------------------------|----------------------------------------|------------------------------------------------------------------------------------------------------------------------------------------------------------|
| 8.6,m <sup>a</sup>     | 195                                               | $\approx 5.2$                          |                                                                                                                                                            |
| 8.5,m <sup>a</sup>     | ----                                              | $\approx 5.2$                          |                                                                                                                                                            |
| 7.4,m                  | 164                                               | $\approx 5.2$                          | 1DTCOSY at 8.68 ppm selectively enhances the low field portion of this resonance, causing it to present as an approximate doublet.                         |
| 5.3,m                  | 102                                               | $\approx 7.4, 8.5, 8.6$                | Decoupling at 7.4ppm simplifies this resonance to an approximate doublet.<br>1DTCOSY at 8.68 ppm generates a low intensity approximate doublet of doublets |
| 3.2,m                  | 43,49                                             | $\approx 2.6$                          |                                                                                                                                                            |
| 2.6,m                  | 40,54,58                                          | $\approx 2.5, 3.2$                     |                                                                                                                                                            |
| 2.5,m                  | 58,40                                             | $\approx 2.6$                          |                                                                                                                                                            |

<sup>a</sup> both these multiplets consist of a pair of overlapped doublets, one major, one minor intensity.

*b* there are minor resonances at 196, and 104 ppm; the region 43-58 ppm contains 7 signals in total.

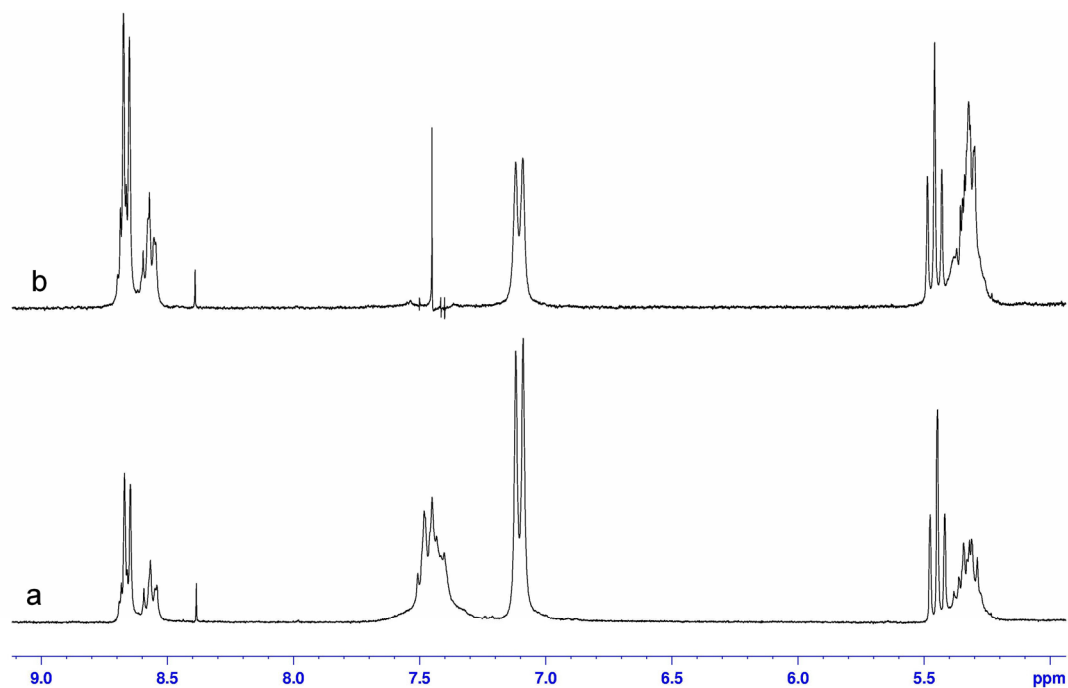

- a <sup>1</sup>H nmr in the range 9.0-5.5ppm, standard spectrum  
b <sup>1</sup>H nmr in the range 9.0-5.5ppm, irradiated at 7.5ppm to decouple resonance of the neighbouring protons; the resonance at 8.5, 8.6 are unaffected, but simplification of the 5.3 ppm resonance takes place, presenting a pattern closer to doublet; the remnant coupling relates to the 8.6 ppm signal.

**Figure S5 Effect of irradiation at 7.5ppm on the 5.3ppm resonance**

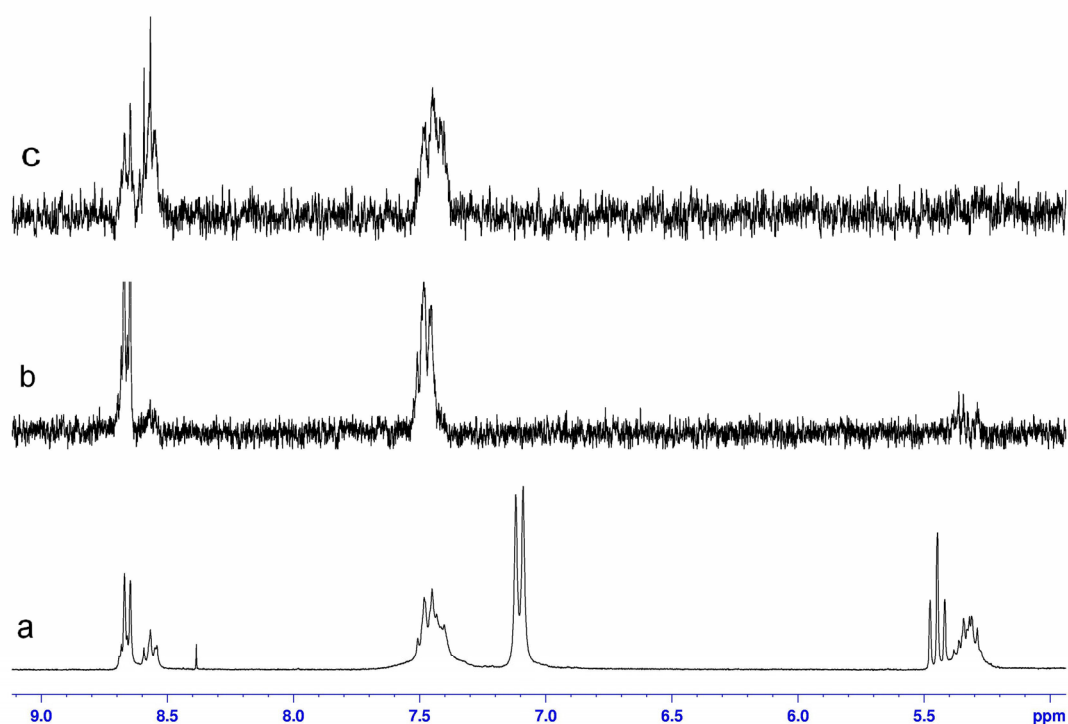

**Figure S6. 1D-TOCSY spectra of hydrolysis product of 4.**

TOCSY spectra with 8.54(*c*) and 8.684(*b*) irradiation to identify the protons in the spin systems associated with the 8.5 vs 8.6 ppm resonances. Spectrum (*a*) is a normal  $^1\text{H}$  spectrum for comparison. In *b* the lower field portion of each resonance is selected whereas in *c* the higher field portion of the 7.5 ppm resonance is enhanced and the 5.3 ppm resonance is unobserved.

Selective 1D TOCSY H-H NMR spectra were obtained on a Bruker Avance-400 MHz spectrometer operating at 400.13 MHz for protons, employing a high-resolution broad-band HX probe using shape-selective pulses. To obtain sufficient selectivity "long" selective pulses of 80 ms were employed with a corresponding power level of 76 dB, a mixing time of 60 ms allowed sufficient magnetisation transfer to neighbouring protons.
